# Supplementary material for: A flexible two-dimensional layered metal–organic framework functionalized with (trifluoromethyl)trifluoroborate: synthesis, crystal structure, and adsorption/separation properties
Source: Royal Society of Chemistry journal article supplement (doi:10.1039/c9dt04836g), 2020-01-01
Supplement: c9dt04836g1.pdf [file c9dt04836g1.pdf]

## Supporting information

### Flexible Two-Dimensional Layered Metal-Organic Framework Functionalized with (Trifluoromethyl)trifluoroborate: Synthesis, Crystal Structure, and Adsorption/Separation Properties

Atsushi Kondo,\*<sup>§</sup><sup>a</sup> Hiroshi Kajiro,\*<sup>b</sup> Tomohiro Nakagawa,<sup>c</sup> Hideki Tanaka,<sup>d</sup> Hirofumi Kanoh<sup>c</sup>

<sup>a</sup> Department of Applied Chemistry, Graduate School of Engineering, Tokyo University of Agriculture and Technology, 2-24-16 Naka-cho, Koganei, Tokyo 184-8588 Japan.

<sup>b</sup> Nippon Steel Co., Advanced Technology Research Laboratories Environmental Research Lab., 20-1 Shintomi, Futaba, Chiba 293-8511 Japan.

<sup>c</sup> Department of Chemistry, Graduate School of Science, Chiba University, 1-33 Yayoi, Inage, Chiba 263-8522 Japan.

<sup>d</sup> Research Initiative for Supra-Materials, Shinshu University, 4-17-1 Wakasato, Nagano 380-8553 Japan.

<sup>§</sup> Present address: Faculty of Science and Technology, SEIKEI University, 3-3-1 Kichijojikitamachi, Musashino-shi, Tokyo 180-8633, Japan

\*A.K. kondoa@st.seikei.ac.jp, H.K. kajiro.6ey.hiroshi@jp.nipponsteel.com

#### Contents

**Figure 1S.** Repetitive CO<sub>2</sub> adsorption.

**Figure 2S.** Preservation test in synthetic mother liquid

**Figure 3S.** Schematic representation of a hand-made vacuum/gas loading line for high-pressure mixed-gas separation experiments.

**Figure 4S.** XRD pattern of the residue after TG measurement.

**Figure 5S.** High pressure adsorption isotherms on zeolite 13X and several MOFs.

**Figure 6S.** Pressure dependence of ratio of adsorbed CO<sub>2</sub> over N<sub>2</sub>.

**Table 1S.** Adsorption amount, ratio and selectivity of CO<sub>2</sub> over N<sub>2</sub>.

### Repetitive adsorption property

Carbon dioxide repetitive adsorption characteristics of ELM-13 were evaluated. Pre-treatment under reduced pressure at 110 °C was carried out only before the first, second, and 24th measurement. Other measurements (3rd to 23th) were carried out without pretreatment.

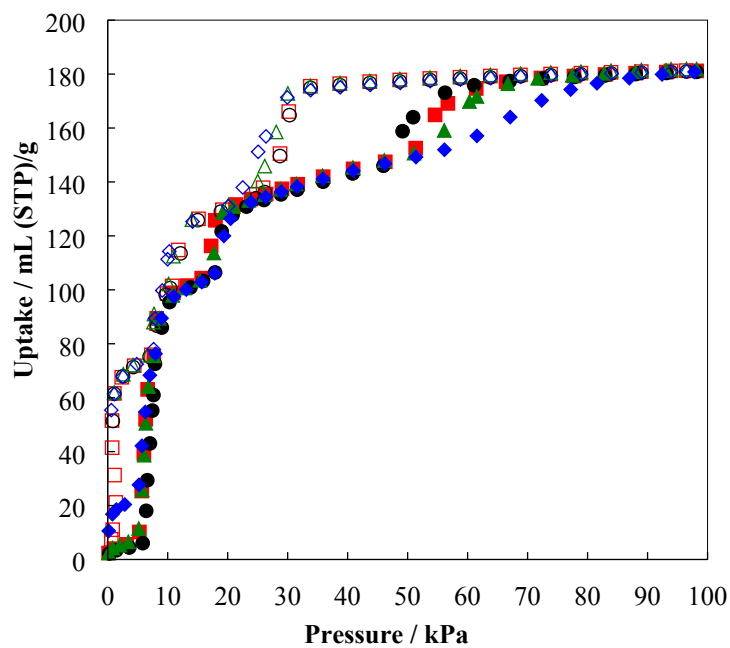

**Figure 1S.** Adsorption isotherms of CO<sub>2</sub> at 195 K: the first (black, circle), 2nd (red, square), 3rd (green, triangle), and 24th (diamond, blue). Open and solid symbol denotes adsorption and desorption, respectively.

### Long-term preservability in synthetic mother liquid

The crystal of ELM-13 was kept in the synthetic mother liquor at room temperature. The crystal was filtered after 9 years, washed with water, air-dried and gas adsorption property was compared to freshly prepared ELM-13.

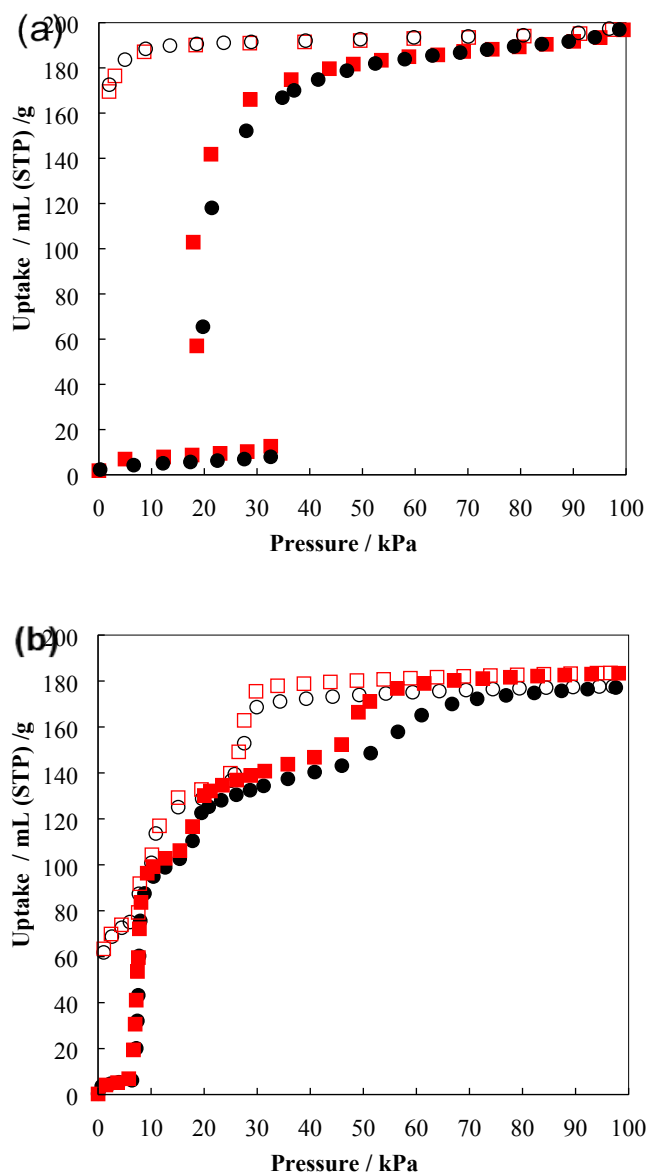

**Figure 2S.** Gas adsorptivity of freshly prepared ELM-13 (black, circle) and ELM-13 aged in mother liquid for 9 years (red, square). Open and solid symbol denotes adsorption and desorption, respectively: (a) N<sub>2</sub> at 77 K, (b) CO<sub>2</sub> at 195 K.

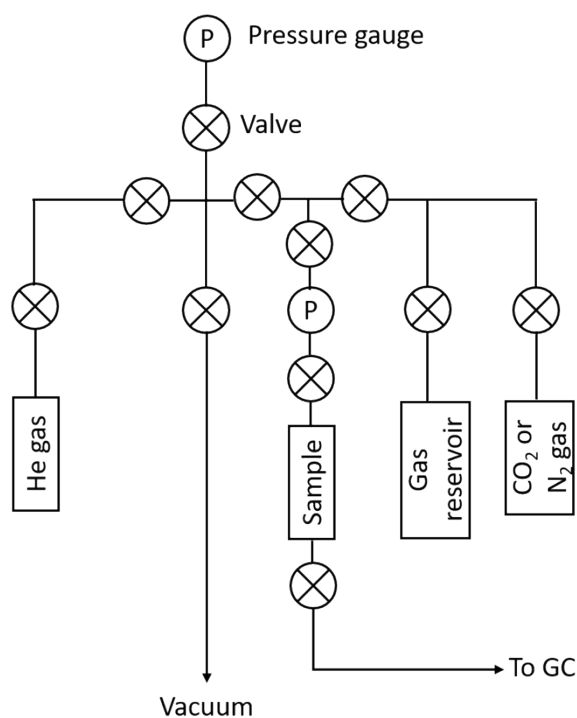

**Figure 3S.** Schematic representation of a hand-made vacuum/gas loading line for high-pressure mixed-gas separation experiments.

### Experimental procedure of high-pressure CO<sub>2</sub>/N<sub>2</sub> mixed-gas separation

High-pressure CO<sub>2</sub>/N<sub>2</sub> mixed-gas separation experiments were performed with a hand-made line shown in Figure 3S. Several grams (ca. 2 g) of powder sample were placed in a stainless steel column with an inner diameter of 3.1 mm and connected to the line. Before the experiment, the column was heated at 373 K for 2 h under vacuum ( $P < 1$  mPa) to activate the sample. Equimolar CO<sub>2</sub>/N<sub>2</sub> mixed gas with a total pressure of 1.0 MPa was introduced into the column containing the sample at 273 K in an ice-water bath. After 30 min to reach adsorption equilibrium, the sample was heated at 353-333 K to desorb the adsorbed gases, and then the desorbed gases were collected in a gas bag with He gas loading. The ratio of CO<sub>2</sub>/N<sub>2</sub> obtained from a GC-9A gas chromatograph with a thermal conductivity detector (Shimadzu Co.) was used to calculate the ratio of the adsorbed gases on the sample.

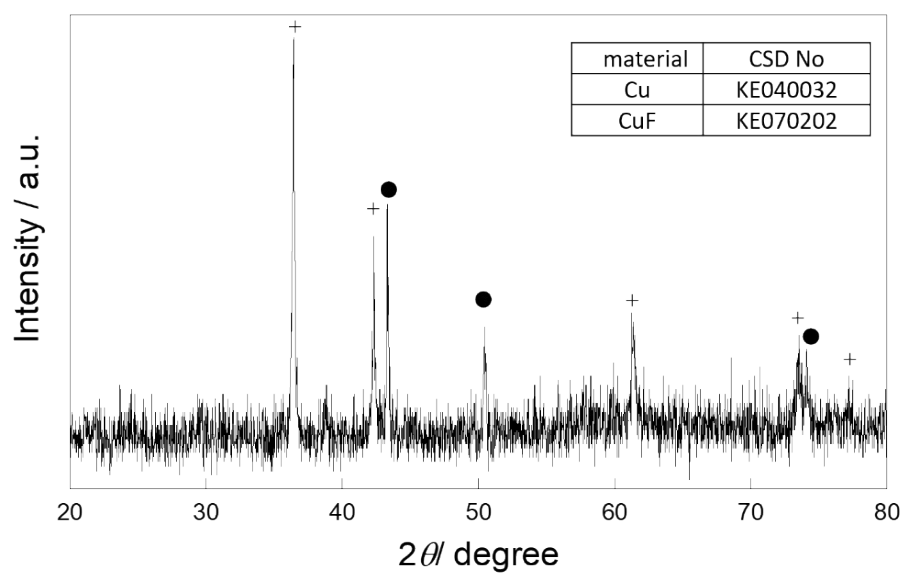

**Figure 4S.** XRD pattern (CuK $\alpha$  radiation,  $\lambda = 1.5418 \text{ \AA}$ ) of the residue after TG measurement. Cross and circle symbol indicates diffraction peaks assigned to CuF (CSD No. KE070202) and Cu (CSD No. KE040032), respectively.

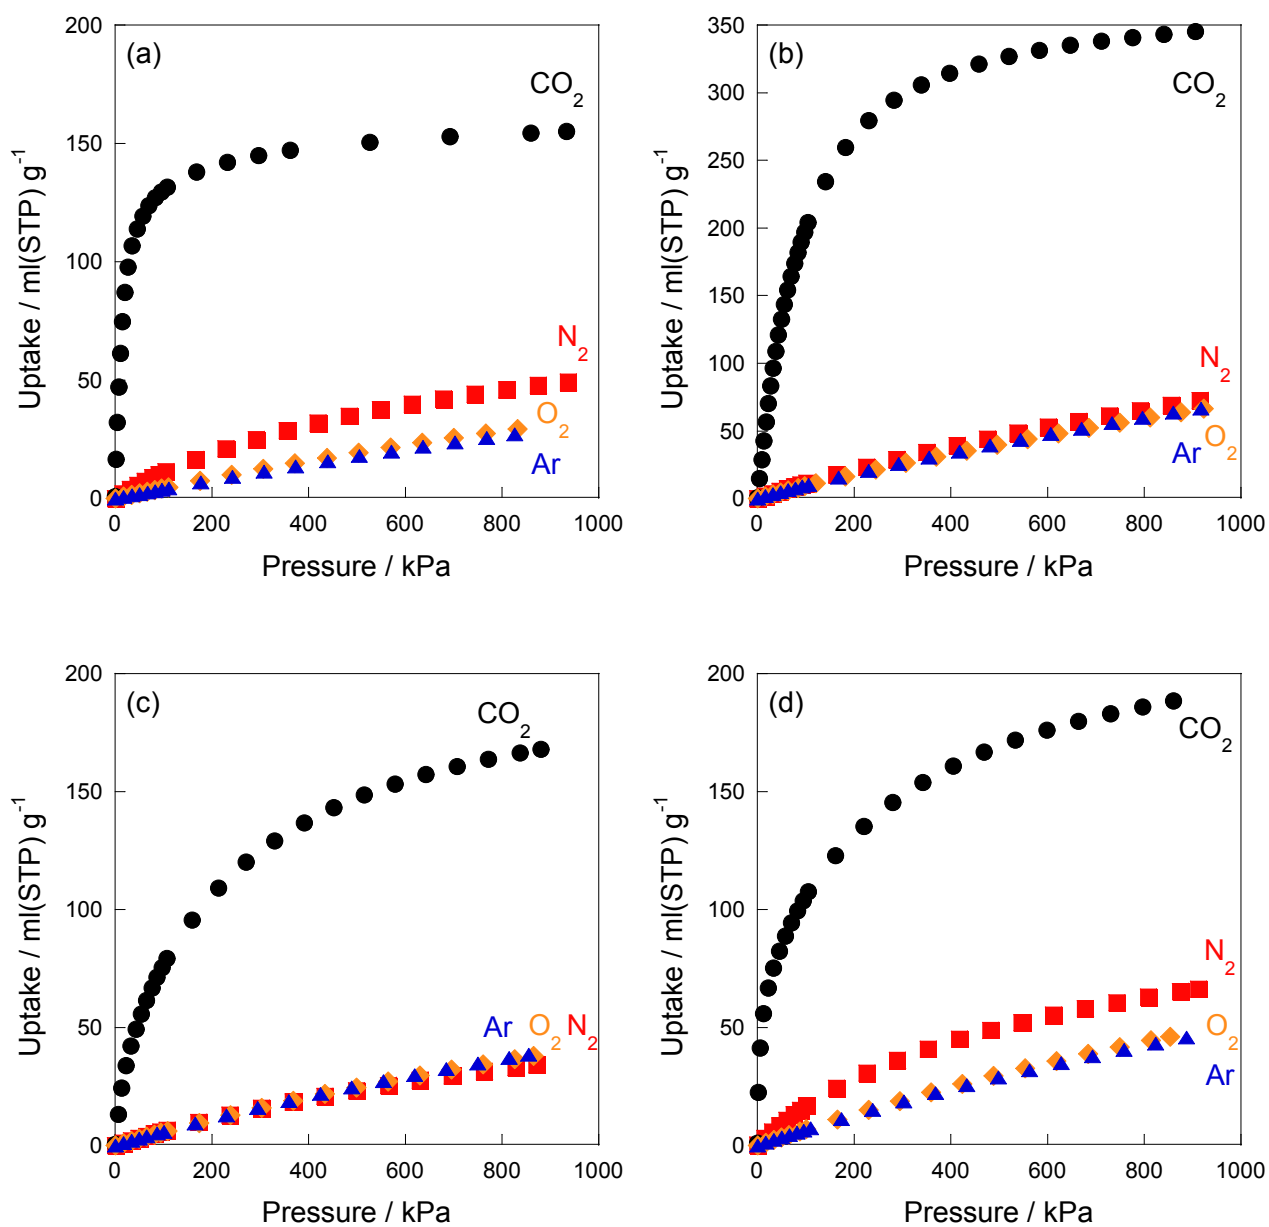

**Figure 5S.** High pressure adsorption isotherms on (a) zeolite 13X, (b) HKUST-1, (c) UiO-66, and (d) Mg-MOF-74 at 273 K. (CO<sub>2</sub>, black; N<sub>2</sub>, red; O<sub>2</sub>, orange; Ar, blue).

### Estimation of CO<sub>2</sub> selectivity

The ratio of adsorbed amount of CO<sub>2</sub> over that of N<sub>2</sub> ( $N_{\text{CO}_2/\text{N}_2} = N_{\text{CO}_2}/N_{\text{N}_2}$ ) was calculated from single component gas adsorption isotherms by dividing the CO<sub>2</sub> adsorption amount by that of N<sub>2</sub> at each pressure points. The adsorbed amounts of CO<sub>2</sub> and N<sub>2</sub> at 273 K and 0.25 MPa and resultant value  $N_{\text{CO}_2/\text{N}_2}$  on zeolite 13X, HKUST-1, UiO-66, Mg-MOF-74 and ELM-13 are summarized in table 1S. The CO<sub>2</sub> selectivities ( $K_{\text{CO}_2}/K_{\text{N}_2}$ ) were also evaluated by using Henry coefficients estimated from the CO<sub>2</sub> and N<sub>2</sub> adsorption isotherms at low pressures except ELM-13. The value of the selectivity on Mg-MOF-74 was took from reference [1]. Pressure dependence of the ratio  $N_{\text{CO}_2/\text{N}_2}$  on the microporous materials in the wide pressure range up to 850 kPa are also shown in Figure 6S.

**Table 1S.** Adsorption amount of CO<sub>2</sub> and N<sub>2</sub>, ratio of adsorbed CO<sub>2</sub> over N<sub>2</sub> ( $N_{\text{CO}_2/\text{N}_2}$ ) at 273 K and 0.25 MPa, and selectivity ( $S_{\text{Henry}}$ ) evaluated from Henry coefficients on selected microporous materials.

|             | CO <sub>2</sub> / mmol g <sup>-1</sup> | N <sub>2</sub> / mmol g <sup>-1</sup> | $N_{\text{CO}_2/\text{N}_2}$ | $S_{\text{Henry}}$ |
|-------------|----------------------------------------|---------------------------------------|------------------------------|--------------------|
| Zeolite 13X | 6.5                                    | 0.95                                  | 6.8                          | 45                 |
| HKUST-1     | 12.7                                   | 1.2                                   | 10.6                         | 26                 |
| UiO-66      | 5.1                                    | 0.62                                  | 8.2                          | 25                 |
| Mg-MOF-74   | 8.1                                    | 1.5                                   | 5.4                          | 29*                |
| This work   | 2.8                                    | 0.035                                 | 81                           | -                  |

\*The value was used from reference [1]

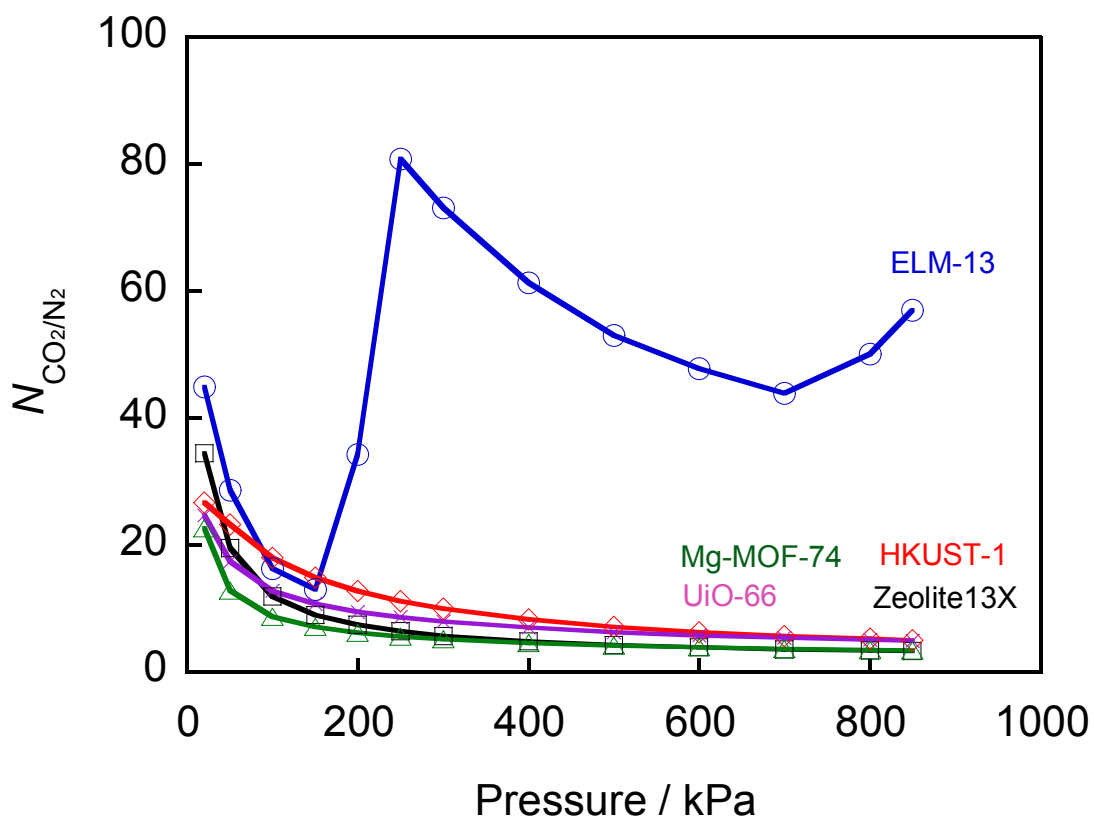

**Figure 6S.** Pressure dependence of the ratio of adsorbed CO<sub>2</sub> over N<sub>2</sub> at 273 K. (ELM-13, blue; zeolite 13X, black; HKUST-1, red; UiO-66, purple; Mg-MOF-74, green)

References

- [1] A. N. Dickey, A. Ö. Yazaydin, R. R. Willis, R. Q. Snurr, *Can. J. Chem. Eng.*, **2012**, *90*, 825-832.
